1 **Morphine-induced side effects can be differentially modulated by cannabidiol in**  
2 **male and female rats.**

3

4 Carlos Henrique Alves Jesus<sup>1\*</sup>, Jaqueline Volpe<sup>2\*</sup>, Bruna Bittencourt Sotomaior<sup>1</sup>, Maria  
5 Augusta Ruy Barbosa<sup>1</sup>, Matheus Vinicius Ferreira<sup>1</sup>, Fernanda Fiatcoski<sup>1</sup>, Karina  
6 Genaro<sup>3,6</sup>, José Alexandre de Souza Crippa<sup>4,5</sup>, Dênio Emanuel Pires Souto<sup>2</sup>, Joice Maria  
7 da Cunha<sup>1,6</sup>.

8

9 <sup>1</sup>Department of Pharmacology, Biological Sciences Sector, Federal University of Paraná,  
10 Curitiba, Paraná, Brazil.

11 <sup>2</sup>Department of Chemistry, Federal University of Paraná, Curitiba, Paraná, Brazil.

12 <sup>3</sup>Department of Anesthesiology, University of California, Irvine, California, USA.

13 <sup>4</sup>Department of Neuroscience and Behavioral Sciences, Ribeirão Preto Medical School,  
14 University of São Paulo, São Paulo, Brazil.

15 <sup>5</sup>National Institute of Science and Technology for Translational Medicine (INCT-TM-  
16 CNPq), Ribeirão Preto, São Paulo, Brazil.

17 <sup>6</sup>Institute of Neurosciences and Behavior (INeC), University of São Paulo, Ribeirão Preto,  
18 São Paulo, Brazil.

19

20 \*Authors have made equal contributions to this article.

21

22 Corresponding Author:

23 Carlos Henrique Alves Jesus, PhD.

24 Laboratory of Pharmacology of Pain, Department of Pharmacology, Biological Sciences  
25 Building, Federal University of Parana, P.O. Box 19031, Curitiba, Paraná, Brazil.

26 ZIP code: 81540-990.

27 Tel.: +55 41 99578-4291.

28 E-mail address: [carlos.alves.jesus@hotmail.com](mailto:carlos.alves.jesus@hotmail.com)

29

30

31

32 **Abstract**

33  
34 Opioid use disorder (OUD) is a public health problem that includes symptoms such as  
35 withdrawal syndrome and opioid-induced hyperalgesia (OIH). Currently, drugs to treat  
36 side effects of opioids also have undesirable effects, which lead to limitations. This study  
37 investigated the effect of a treatment with cannabidiol (CBD) in morphine-induced  
38 hyperalgesia and withdrawal signs in morphine-dependent rats. Male and female rats  
39 were submitted to morphine-induced physical dependence protocol consisting of a twice  
40 daily treatment with morphine (7.89 mg/kg, 1ml/kg, s.c.) for 10 days. Nociception was  
41 measured using the hot plate test and morphine-induced thermal hyperalgesia was  
42 equally achieved following 7-10 days of morphine administration in male and female rats.  
43 Repeated treatment with CBD (30 mg/kg) was sufficient to prevent thermal hyperalgesia  
44 in male and female rats. Subsequently, rats received an acute administration of naloxone  
45 (2 mg/kg. s.c.), 90 minutes after the morphine treatment on day 11, the number of  
46 withdrawal signs was scored. Rats that received treatment exclusively with morphine  
47 presented significant withdrawal signs compared to control (Water). Morphine-dependent  
48 female rats showed a prevalent stereotyped behavior of rearing, whereas male rats had  
49 the sign of teeth chattering as the most preeminent. Treatment with CBD on day 11  
50 partially attenuated the withdrawal signs in morphine-dependent male rats, but not female  
51 rats. Altogether, our data provide evidence of an anti-hyperalgesic effect of CBD in rats.  
52 Male and female rats treated chronically with morphine exhibited withdrawal signs in  
53 different ratios, indicating sex-differences in withdrawal behavior and CBD attenuated  
54 withdrawal signs in a sex-dependent manner.

55

56

57 **Keywords:** Cannabidiol; Opioids; Morphine-induced hyperalgesia; Withdrawal  
58 syndrome; Sex-differences.

59

60

61

62

63

64

65

66

67

68 **List of Abbreviations**

69

70 5HT1A, serotonin 1A receptor;

71 AMPA,  $\alpha$ -amino-3-hydroxy-5-methyl-4-isoxazolepropionic acid;

72 ANOVA, analysis of variance;

73 CBD, cannabidiol;

74 CB<sub>1</sub>, cannabinoid receptor type 1

75 CPP, conditioned place preference;

76 MOR, morphine;

77 OUD, opioid use disorder;

78 OIH, opioid-induced hyperalgesia;

79 TRPV1, transient receptor potential channel subfamily V member 1;

80 Veh, vehicle;

81

## 82        **1. Introduction**

83            Chronic use of opioids is associated with several side effects, including tolerance,  
84 hyperalgesia, dependence, and abuse [1]. These problematic consequences are defined  
85 as opioid use disorder (OUD), a major public health concern that is estimated to affect  
86 approximately 26.8 million people worldwide [2] and annually, an increasing number of  
87 deaths is attributable to opioid use [3,4]. Clinical and non-clinical studies have shown that  
88 females are more sensitive to the rewarding effects of addictive drugs [5–7] and present  
89 higher severity of withdrawal symptoms [8,9], compared to males. Importantly, females  
90 were reported to transition faster than males to OUD [10]. It has also been reported that  
91 females show a higher severity of symptoms at late morphine withdrawal. The severity of  
92 symptoms was positively correlated with the phosphorylated CREB in the ventral  
93 tegmental area of the brain, a key area for the reward system[9]. Chronic treatment with  
94 morphine has also been associated with a selective internalization of the  $\mu$ -opioid  
95 receptor in the locus coeruleus of male, but not female rats. In addition, estrogen has  
96 shown to potentiate a switch  $\mu$ -opioid receptors from a coupling with Gai/o to a coupling  
97 with G $\beta$ s proteins in female rats[11]. Despite the sex-related differences, the preclinical  
98 research in OUD is still performed predominantly in males.

99            OUD leads to severe symptoms including tolerance, withdrawal syndrome, opioid-  
100 induced hyperalgesia (OIH) and others [1]. The mechanism behind OIH is complex and  
101 involves chemical changes in the central nervous system [12]. Although the prevalence  
102 and epidemiology of OIH is not well documented [13], OIH is not a rare complication of  
103 opioid use and the results vary substantially in the basic literature [14,15].

104            Pharmacological strategies have been used to minimize the side effects of opioids.  
105 However, currently available treatments also have undesirable effects, which lead to  
106 potential limitations to their use [16,17]. In recent years, the growth in public support for  
107 cannabis legalization and decriminalization has shown the  
108 therapeutic potential for cannabis derivatives in neuropsychiatry disorders, including  
109 OUD [18]. The endocannabinoid and the opioid system, including its receptors, have  
110 shown to interact, and are commonly distributed in areas of the brain (i.e., periaqueductal  
111 gray, locus coeruleus, ventral tegmental area and others). For instance, studies have  
112 demonstrated that the modulation of CB<sub>1</sub> receptors can attenuate the development of

113 morphine-induced conditioned place preference[19], whereas the modulation of  $\mu$ -opioid  
114 receptors blocks the conditioned place preference induced by tetrahydrocannabinol[20].  
115 However, there is non-clinical and clinical data on the role of CB<sub>1</sub> receptors and its  
116 agonists on the management of opioid withdrawal, and it shows that CB<sub>1</sub> agonism can  
117 enhance the rewarding properties of opioids and the severity of withdrawal symptoms[21–  
118 23]. Thus, the elucidation of the role of CB<sub>1</sub> receptors in opioid withdrawal, and the use of  
119 ligands that do not bind to CB<sub>1</sub> receptors is of importance for the management of opioid  
120 withdrawal.

121 Cannabidiol (CBD), the second most prevalent compound present in the *Cannabis*  
122 plant, has shown to produce a wide range of therapeutic effects such as anti-  
123 inflammatory, antioxidant [24], anxiolytic and antidepressant [25,26] and efficacy in  
124 substance use disorder [27]. CBD does not show to interact as a direct agonist or  
125 antagonist on cannabinoid receptors, but rather as an allosteric modulator in cannabinoid  
126 and opioid receptors [28]. In addition, CBD does not show reinforcing effects by itself, and  
127 can also reduce the rewarding characteristic of drugs of abuse, such as cocaine and  
128 opioids, by mechanisms involving 5-HT<sub>1A</sub> and TRPV1 receptors, for instance [29–31].

129 A recent clinical study has shown that CBD may reduce cue-induced craving and  
130 anxiety in abstinent individuals, mostly men, with heroin use disorder [32]. Moreover, non-  
131 clinical studies have pointed to potential effects of CBD on opioid addictive behaviors [33–  
132 35]. In addition, it is very common for opioid users to prepare their injections from  
133 commercial tablets designed for oral administration. However, injecting solutions made  
134 from tablets involve high risk of embolism and other complications [36]. Thus, improved  
135 preparation approaches, such as cold and lukewarm filtration of morphine tablets, has  
136 been applied to reduce harm of injection[37].

137 However, little is known about the effects of CBD in the morphine-induced  
138 hyperalgesia, in the opioid withdrawal signs, and in the sex-dependent effects related to  
139 its therapeutic efficacy. To offset part of this shortcoming, we carried out experiments to  
140 induce morphine side effects by injecting a solution made by cold extraction of  
141 commercial morphine tablets, and we aimed to compare the effect of CBD in male and  
142 female rats tested in the hot plate test to investigate morphine-induced hyperalgesia.  
143 Subsequently, precipitated opioid withdrawal signs were investigated.

144

## 145 **2. Materials and Methods**

### 146 *2.1. Animals*

147 Male and female Wistar rats (200-250 g) were provided by the Federal University  
148 of Parana colony and placed in plastic cages (41cmx32cmx16.5cm). The animals were  
149 maintained in standard conditions of environment with appropriate temperature ( $21 \pm 2$   
150 °C) and illumination cycle (12 h light/12 h dark), with food and water ad libitum. All  
151 experimental procedures and protocols were previously approved by the Federal  
152 University of Paraná Institutional Committee for the Ethical Use of Animals (CEUA/BIO-  
153 UFPR; authorization #1415). This study was performed in accordance with the ethical  
154 guidelines of Brazilian legislation on animal welfare following the ARRIVE guideline. All  
155 efforts were made to minimize animal suffering and the number of animals used.

156

### 157 *2.2. Drugs*

158 Cannabidiol (CBD; 3, 10 or 30 mg/kg, i.p., volume injection 1 ml/kg) 99,6% pure  
159 (without any other cannabinoid) was kindly supplied by BSPG-Pharm, Sandwich, United  
160 Kingdom. CBD was freshly diluted in a solution of 1:3:16 of tween 80, ethanol and saline.  
161 Naloxone (Sigma Aldrich, St. Louis, Missouri, United States) was freshly diluted in saline.  
162 The morphine solution used to induce physical dependence and hyperalgesia was  
163 prepared by cold extraction of 30 mg tablets of morphine sulfate (Cristália, Itapira, São  
164 Paulo, Brazil), carried by the following methodology: several tablets were first crushed  
165 using a porcelain mortar and pestle. The resulting powder was mixed with a quantity of  
166 distilled water to initially produce a 20 mg/mL morphine solution. This solution was stirred  
167 for 20 minutes assisted by an ultrasonic bath, followed by a filtration with a 0.45 µm  
168 Durapore membrane filter (Millipore, São Paulo, Brazil). Finally, the solution volume was  
169 adjusted with distilled water to obtain an estimated concentration of 10 mg/mL [36]. The  
170 final solution concentration was confirmed by UV-Vis spectroscopy (UV-2401 PC,  
171 Shimadzu), since morphine has a characteristic absorption band at 285 nm, by using a  
172 standard addition method [38]. The standard addition method consisted of adding a  
173 predetermined standard morphine solution to the extracted solution diluted by 500x. The  
174 standard used was morphine sulfate (Merck S.A, São Paulo, Brazil). Figure 1 displays

175 morphine calibration curve (n=9) at 285 nm absorbance (panel A), and the UV-Vis spectra  
176 of one of its replicates, with concentration ranging from 0.01 to 0.1 mg/mL (panel B). The  
177 method, previously tested by McLean et al.[36], allowed to obtain similar final  
178 concentrations of morphine ( $7.89 \pm 0.06$  mg/mL) from distinct extractions.

179

### 180 2.3. *Morphine-induced physical dependence and hyperalgesia protocol*

181 Morphine-induced dependence and hyperalgesia were induced as previously  
182 described [39,40]. Briefly, all animals were allocated in the laboratory facilities to get used  
183 to the environment for 7 days. During acclimation, animals were submitted to daily  
184 handling to get used to the experimenter. Male and female rats were made dependent on  
185 morphine sulfate with a routine protocol of two subcutaneous (s.c; volume injection 1  
186 ml/kg) injections of morphine (Mor group) twice daily (8:00 am and 6:00 pm) for 10 days  
187 (Figure 2A). Rats in the control group received twice-daily injections of distilled water  
188 (water group).

189

### 190 2.4. *Hot plate test*

191 According to Pacheco et al. [41], the hot plate test was performed using a hot plate  
192 apparatus (Ugo Basile SRL), with the temperature maintained at  $50 \pm 1^\circ\text{C}$  and a cutoff  
193 time of 25 seconds to prevent skin damage. The latency (in seconds) for animals to  
194 display behaviors such as licking/flinching of the fore and hind paws or jumping was  
195 measured and used to evaluate development of morphine-induced thermal hyperalgesia  
196 in male and female rats. Latency was measured before the beginning of treatments with  
197 morphine (baseline) and 2, 4, 7 and 10 days after the beginning of treatments (Figure  
198 2A). Treatment with CBD (3, 10 or 30 mg/kg; volume injection 1 ml/kg) was given 10  
199 minutes before each morphine injection, to evaluate the effect of a co-treatment with CBD  
200 on the development of morphine-induced hyperalgesia. To avoid the acute  
201 antinociceptive effects of treatments (morphine or CBD), the hot plate test was performed  
202 before the morning treatments on the specified days. Hot plate tests were performed by  
203 an experienced experimenter blind to the treatments.

204

205



## 206 2.5. *Naloxone precipitated withdrawal signs*

207 Withdrawal susceptibility was assessed by administration of the selective  $\mu$ -opioid  
208 receptor antagonist naloxone (2 mg/kg; volume injection 1 ml/kg). On the morning of the  
209 11th day, all animals received a single dose of morphine. Fifteen (15) minutes before the  
210 evaluation of drug withdrawal, rats were placed in acrylic boxes to acclimate. Ninety  
211 minutes after the last morphine treatment, male and female rats received naloxone  
212 injection and were immediately placed back in the test box. The number of withdrawal  
213 signs such as rearing, teeth chattering, body tremors, defecation (number of fecal boli),  
214 digging, sniffing, grooming, and jumping was counted for 30 minutes. Groups of male and  
215 female rats were treated with CBD (3, 10 or 30 mg/kg; volume injection 1 ml/kg) 10  
216 minutes before the morphine injection one more time on the 11<sup>th</sup> day of the protocol, to  
217 evaluate the effect of an acute treatment with CBD on naloxone precipitated withdrawal  
218 behavior (Figure 2A). The doses of CBD used in the protocol were based on previous  
219 studies [26,42,43].

220

## 221 2.6. *Statistical Analysis*

222 Statistical differences were determined by ANOVAs using GraphPad Prism 8.0  
223 (GraphPad Software, Inc., San Diego, CA, USA). For assessment of behavioral  
224 experiments, all data are expressed as mean + standard error. Two-way repeated-  
225 measures ANOVA with Bonferroni's multiple comparisons test was used to assess the  
226 effect of treatments, time and interaction between factors. The estimated percentages of  
227 each different withdrawal sign calculated from the total number of withdrawal signs during  
228 the test period for male and female rats (dependent group only) was compared by  
229 unpaired Student's t-test. One-Way ANOVA followed by the post-hoc analysis of  
230 Bonferroni was used to compare the number of withdrawal signs between groups treated  
231 with CBD or vehicle. In all cases, the threshold for significance was  $p < 0.05$ .

232

## 233 3. **Results**

234 Figure 2 shows the latency to paw withdrawal evaluated in male (panel B) and  
235 female rats (panel C) treated with CBD and morphine. Two-way ANOVA indicated no  
236 significant effects of treatment [ $F(4, 44) = 1.783$ ;  $p = 0.1494$ ] and interaction between time



237 and treatment [ $F(16, 176) = 1.441$ ;  $p = 0.1272$ ], but significant effect of time [ $F(4, 176) =$   
238  $8.729$ ;  $p < 0.0001$ ] in male rats. In female rats, two-way ANOVA indicated no significant  
239 effects of treatment [ $F(4, 40) = 2.562$ ;  $p = 0.0531$ ] and interaction between time and  
240 treatment [ $F(16, 160) = 1.386$ ;  $p = 0.1545$ ], but significant effect of time [ $F(4, 160) = 9.662$ ;  
241  $p < 0.0001$ ].

242 Bonferroni's multiple comparison test showed that male rats treated with morphine  
243 (Veh+Mor) had a reduced latency to paw withdrawal in the hot plate test, when compared  
244 to its respective water treated group (Veh+Water) on days 7 ( $p = 0.0019$ ) and 10 after the  
245 initial treatment ( $p = 0.0088$ ), suggesting the development of OIH. Repeated treatment with  
246 CBD at the dose of 30 mg/kg (CBD 30 + Mor) reduced OIH in male rats on day 7  
247 ( $p = 0.0242$ ) and 10 ( $p = 0.0322$ ; Figure 2 panel B).

248 Bonferroni's multiple comparison test also revealed that female rats treated with  
249 morphine (Veh+Mor) showed reduced latency to paw withdrawal in the hot plate test,  
250 when compared to its respective water treated group (Veh+Water) on days 7 ( $p = 0.0202$ )  
251 and 10 after the initial treatment ( $p = 0.0078$ ), which also suggests the development of  
252 OIH. Repeated treatment with CBD (30 mg/kg, CBD 30 + Mor) reduced OIH in female  
253 rats on day 10 ( $p = 0.0057$ ; Figure 2 panel C).

254 Figure 2 panel D shows the latency to paw withdrawal evaluated on day 7 after the  
255 beginning of treatments, only in the control groups of male and female rats treated with  
256 vehicle or morphine and not treated with CBD. Two-way ANOVA indicated significant  
257 effect of treatment [ $F(1, 32) = 28.76$ ;  $p < 0.0001$ ], but not sex [ $F(1, 32) = 3.10$ ;  $p = 0.0878$ ]  
258 or an interaction between these factors [ $F(1, 32) = 0.16$ ;  $p = 0.1694$ ]. Bonferroni's multiple  
259 comparison test indicated no significant differences between female and male groups  
260 treated with morphine (Mor) 7 days after the beginning of treatments. As for 10 days after  
261 the beginning of treatments (Figure 2, panel E), two-way ANOVA also indicated only an  
262 effect of treatment [ $F(1, 32) = 26.64$ ;  $p < 0.0001$ ], suggesting that thermal hyperalgesia  
263 was developed at the same time frame in male and female rats treated twice daily with  
264 morphine.

265 As shown in Table 1 and Figure 3, morphine-dependent male and female rats  
266 showed significant signs of withdrawal after injection of naloxone (2 mg/kg, s.c.) when  
267 compared to their respective control groups treated with water. Two-way ANOVA

268 revealed significant differences in treatment and/or sex and/or interaction between these  
269 factors in the different signs of withdrawal evaluated (Table 1).

270 Bonferroni's multiple comparison test indicated that morphine-dependent male rats  
271 showed differences in the number of withdrawal signs of defecation ( $p < 0.0001$ ), sniffing  
272 ( $p = 0.0040$ ), teeth chattering ( $p < 0.0001$ ), digging ( $p = 0.0042$ ), body tremors ( $p = 0.0023$ )  
273 and jumping ( $p < 0.05$ ), when compared to the water-treated male rats. No differences  
274 were detected in the withdrawal signs of rearing ( $p = 0.83$ ) and grooming ( $p > 0.99$ ) (Figure  
275 3).

276 In morphine-dependent female rats, Bonferroni's multiple comparison test  
277 revealed differences in the number of withdrawal signs of rearing ( $p = 0.0074$ ), defecation  
278 ( $p < 0.0001$ ), teeth chattering ( $p = 0.0494$ ), body tremors ( $p = 0.0014$ ) and jumping ( $p < 0.05$ ),  
279 when compared to the water-treated female rats. No differences were detected in the  
280 withdrawal signs of sniffing ( $p = 0.9190$ ), grooming ( $p > 0.99$ ) and digging ( $p = 0.1922$ )  
281 (Figure 3).

282 Bonferroni's multiple comparison test revealed sex-differences in the number of  
283 withdrawal signs of rearing ( $p = 0.0267$ ), defecation ( $p = 0.0446$ ), sniffing ( $p = 0.0174$ ) and  
284 teeth chattering ( $p = 0.0411$ ), but not grooming, digging, body tremor and jumping  
285 ( $p > 0.05$ ). Morphine-dependent female rats showed a higher number of defecation and  
286 rearing, and a lower number of sniffing and teeth chattering, than morphine-dependent  
287 male rats (Figure 3).

288 Table 2 shows the estimate percentages for each withdrawal sign calculated from  
289 the total number of withdrawal signs elicited during the 30-minutes period of the test in  
290 morphine dependent male and female rats. The sign of teeth chattering was the most  
291 preeminent manifestation of opioid-withdrawal for male morphine-dependent rats (29%),  
292 whereas the sign of rearing was the most preeminent for female rats (31%). Furthermore,  
293 student's T test indicated that female morphine-dependent rats showed a higher  
294 percentage of rearing [ $t = 4.105$ ;  $df = 14$ ;  $p = 0.0011$ ] and defecation signs [ $t = 2.248$ ;  $df = 14$ ;  
295  $p = 0.0412$ ] than male morphine-dependent rats. No differences were found between male  
296 and female dependent rats in the estimate mean percentages of grooming [ $t = 1.131$ ;  
297  $df = 14$ ;  $p = 0.2771$ ], digging [ $t = 0.9333$ ;  $df = 14$ ;  $p = 0.3670$ ], sniffing [ $t = 1.754$ ;  $df = 14$ ;

298 p=0.1013], teeth chattering [t=1.250; df=14; p=0.2316], body tremor [t=0.7062; df=14;  
299 p=0.4917] and jumping [t=0.8120; df=14; p=0.4304].

300 On the next set of experiments, both male and female rats were treated again with  
301 different doses of CBD (3, 10 and 30 mg/kg, i.p.), 10 minutes before the injection of  
302 morphine in the morning of the 11<sup>th</sup> day during the dependence protocol. As shown in  
303 Figure 4, One-way ANOVA indicated significant effect of treatment with CBD (day 11) in  
304 the total number of the withdrawal signs of sniffing [F(3, 35) = 4.785; p= 0.0067] and teeth  
305 chattering [F(3, 35) = 4.702; p= 0.0073] precipitated by naloxone injection in male  
306 morphine-dependent rats. Bonferroni's multiple comparison test revealed that treatment  
307 with CBD with the doses of 3, 10 and 30 mg/kg (CBD 3 – Mor, CBD 10 – Mor and CBD  
308 30 – Mor), reduced the total number of sniffing and teeth chattering Although One-way  
309 ANOVA did not indicate effect of treatment in the total number of body tremors in male  
310 rats, Bonferroni's multiple comparison test revealed significant effect of treatment with 10  
311 mg/kg of CBD (CBD 10 – Mor; p= 0.0454) (Figure 4).

312 Furthermore, one-way ANOVA indicated significant effect of treatment with CBD  
313 in the withdrawal of defecation [F(3, 32) = 7.607; p= 0.0454]. However, Bonferroni's  
314 multiple comparison test did not evidence significant effect of CBD in the total number of  
315 defecations in any of the doses tested (p>0.05). No significant differences were observed  
316 in the total number of the withdrawal signs of rearing [F(3, 36) = 0.4518; p= 0.7176],  
317 grooming [F(3, 36) = 0.5210; p= 0.6706], digging [F(3, 34) = 0.9698; p= 0.4183] and  
318 jumping [F(3, 36) = 0.2027; p= 0.8939], in the groups treated with CBD (CBD 3 – Mor,  
319 CBD 10 – Mor and CBD 30 – Mor), when compared to the control group (Veh-Mor) in  
320 male rats (Figure 4).

321 As shown in Figure 5, CBD treatment had no effect in the withdrawal signs of  
322 female rats, in any of the doses tested (CBD 3 – Mor, CBD 10 – Mor and CBD 30 – Mor).  
323 One-way ANOVA indicated no significant effect of treatment in the total number of  
324 withdrawal signs of rearing [F(3, 36) = 0.5418; p= 0.6568], defecation [F(3, 36) = 1.616;  
325 p= 0.2026], sniffing [F(3, 36) = 0.4368; p= 0.7280], teeth chattering [F(3, 36) = 1.019; p=  
326 0.3955], grooming [F(3, 36) = 0.1789; p= 0.9100], digging [F(3, 36) = 1.965; p= 0.1366],  
327 body tremor [F(3, 36) = 0.1517; p= 0.9240] and jumping [F(3, 36) = 1.744; p= 0.1755] in  
328 female morphine-dependent Wistar rats, when compared to the control group (Veh-Mor).

329

#### 330 **4. Discussion**

331 The primary finding of our study is that morphine sulfate solution, prepared through  
332 filtration of tablets and given subcutaneously twice daily for 10 days, induced thermal  
333 hyperalgesia and physical dependence in both male and female rats, as shown by  
334 reduced latency in the hot plate test and the different withdrawal signs precipitated by  
335 naloxone injection, respectively. In addition, our study shows evidence of sex-differences  
336 in the expression of withdrawal signs in Wistar rats. Lastly, the present study  
337 demonstrated that CBD reduces morphine induced hyperalgesia in both sexes and  
338 attenuates withdrawal signs, such sniffing, teeth chattering and body tremor, in morphine-  
339 dependent male rats, but not female rats.

340 Morphine-induced physical dependence and hyperalgesia in rodents can be  
341 induced by different methods such as implantation of subcutaneous pellets [44,45], oral  
342 ingestion of morphine [46] and subcutaneous daily injections [39], as well as different  
343 dose ranges [39,47]. The solution made by a filtration of crushed tablets may not  
344 represent the first choice of solution for the investigation of the addictive effects of  
345 morphine in a non-clinical study, due to the potential presence of excipients. In addition,  
346 further studies investigating potential effect differences between filtered solution and pure  
347 morphine solution are necessary, and for that reason might indicate a limiting factor in  
348 our study. Nonetheless, solutions made of commercial tablets is one of the alternatives  
349 applied by users as a source of drug, and it represents a feature encountered in the  
350 clinical setting[36,37].

351 In our study male and female rats treated for 10 days with morphine solution  
352 prepared by filtration of commercial tablets developed thermal hyperalgesia starting 7  
353 days after the beginning of treatments. This result is in accordance with previous studies  
354 showing that chronic exposure to morphine induces thermal hyperalgesia in non-clinical  
355 models [40,48]. There is a volume of conflicting data indicating that the hyperalgesic effect  
356 of morphine might be different between sexes. For instance, Holtman and Wala [49]  
357 showed that female rats had a markedly greater response of thermal hyperalgesia to a  
358 low dose of morphine, compared to male rats. o et al. [50] demonstrated that low dose  
359 infusion of morphine (1.6 mg/kg/day) caused hyperalgesia that was evident earlier in

360 female mice, when compared to male mice, and this manifestation dissipated earlier in  
361 males than in females. However, a larger dose of morphine (40 mg/kg/day) induced  
362 hyperalgesia that was identical in onset, magnitude, and duration between sexes. The  
363 impact of the estrous cycle on morphine-induced hyperalgesia is not well defined in  
364 rodents [51], but it has been reported that ovariectomy causes hyperalgesia, induced by  
365 low doses of morphine in female mice, to dissipate in a manner similar to males, an effect  
366 blocked by estrogen treatment [50], which indicates that ovarian steroids might divert the  
367 hyperalgesic mechanisms of morphine. Thus, further studies are required for the  
368 evaluation of potential fluctuations in the estrous cycle of female rats and their impact on  
369 the morphine-induced hyperalgesia protocol used in the current study.

370 Morphine-induced hyperalgesia involves multiple pathways, but studies have  
371 reported an important role of TRPV1 receptors in the development of this manifestation.  
372 For instance, Vardanyan and colleagues [45] reported that mice with morphine pellets  
373 implanted subcutaneously developed thermal hyperalgesia 7 days after pellet  
374 implantation. Furthermore, this same study has reported that thermal hyperalgesia was  
375 mediated by an increase in TRPV1 receptor function. In our study, repeated treatment  
376 with CBD (30 mg/kg) reduced thermal hyperalgesia in morphine-dependent male and  
377 female rats. Accordingly, CBD has shown potential to treat different experimental  
378 conditions of pain [43,52]. In addition, studies have indicated that co-treatment with  
379 TRPV1 receptor antagonist was able to block the anti-hyperalgesic effect of CBD,  
380 suggesting that CBD may suppress pain through sensitization of TRPV1 receptors  
381 [53,54]. Altogether, these results indicate that CBD reduces morphine-induced  
382 hyperalgesia, and this effect might be potentially mediated by TRPV1 receptor activation.  
383 Further studies are necessary to evaluate the role of TRPV1 receptors in the effect of  
384 CBD on OIH in male and female rodents.

385 Other than hyperalgesia, withdrawal syndrome is also a complication of opioid use  
386 and may involve unpleasant and aversive symptoms (i.e., tachycardia, agitation, anxiety)  
387 [55,56], these symptoms might lead to opioid craving and relapse in patients [57]. In the  
388 present study, both morphine-dependent male and female rats demonstrated significant  
389 withdrawal signs (rearing, grooming, digging, defecation, teeth chattering, sniffing, body  
390 tremor and jumping) after naloxone injection, which is accordance to other non-clinical

391 reports [39,47]. Precipitated withdrawal behavior can be expressed in humans and  
392 laboratory animals as affective and emotional symptoms, as well as somatic signs. A  
393 spectrum of behavior occurs in both rats and mice in a similar manner, as shown by only  
394 few studies that investigated potential differences between species[58]. Studies have also  
395 reported that withdrawal behavior can vary from protocols investigating precipitated or  
396 spontaneous withdrawal[59]. Evaluating animals in observation chambers, for instance,  
397 is one factor that can play a role in the differences in withdrawal behavior, as space  
398 constraint might limit the number of wet dog shakes, abdominal constrictions and writhing  
399 behavior observed during a determined time of testing [58]. In addition, jumping behavior  
400 might be impacted by the height of observation chambers, as rats in withdrawal have  
401 shown to jump less as the height of the chamber increases [60]. Due to these conditions,  
402 behaviors like teeth chattering, salivation, sniffing, hyperirritability, and others, found in  
403 the current study, might be observed more often.

404 Our data indicated that female and male rats showed discrepancies in the total  
405 number of withdrawal signs manifested during the test. Morphine-dependent female rats  
406 preeminently showed the withdrawal signs of rearing and defecation, whereas male rats  
407 showed preeminently the signs of sniffing and teeth chattering. Multiple studies indicate  
408 sex-differences in the behavioral strategies of rodent's manifestation of behavior [61]. For  
409 instance, in fear conditioning behavior, female rodents are more likely to exhibit alternate  
410 responses to fear, such as escape-like darting response, rather than freezing, which is  
411 expressed in male rodents [62]. Regarding addiction, during precipitated nicotine  
412 withdrawal, more somatic withdrawal signs (body shakes, head shakes, ptosis, and  
413 others) were found in male rats, in comparison to female rats [63]. However, studies  
414 exploiting sex differences in opioid withdrawal are lacking, and the few available show  
415 inconsistent results that report greater sensitivity of male rodents or female rodents in  
416 comparison to each other, or even no sex differences [64].

417 There is increasing evidence of interaction between the opioidergic, and  
418 endocannabinoid systems and modulation of cannabinoid receptors has shown to exert  
419 effects on the rewarding effects of opioids [65]. For instance, the administration of a  
420 cannabinoid antagonist is reported to attenuate morphine-induced CPP, whereas  
421 administration of opioid antagonist blocks cannabinoid-induced CPP [19,20]. These



422 mechanisms are not well explored in humans, but a study has shown that individuals who  
423 use opioids have increased cannabinoid type 1 (CB<sub>1</sub>) receptor expression in opioid  
424 rewarding pathways [66]. Regarding opioid withdrawal, exogenous endocannabinoids (2-  
425 arachidonoylglycerol and tetrahydrocannabinol) seem to exert relief of withdrawal  
426 symptoms in rodents (paw tremors, diarrhea, jumps and others) [67,68].

427 In the last decade, CBD, a non-psychotomimetic constituent in the *Cannabis* plant,  
428 has gained popularity in the medical community. CBD is the second most common  
429 phytocannabinoid, does not directly activate CB<sub>1</sub> or CB<sub>2</sub> receptors [69] and it lacks the  
430 rewarding properties which is inherent in another phytocannabinoid, Delta 9-  
431 Tetrahydrocannabinol (THC) [31,70]. Further experiments are necessary to investigate if  
432 CBD treatment alone, given in the schedule proposed in our study, could potentially  
433 induce withdrawal signs. Nonetheless, studies have indicated that CBD treatment does  
434 not induce hedonic effects [70] or conditioned place preference by itself, and does not  
435 produce withdrawal behavior, such as grooming, rubbing and rearing, in mice [71]. A  
436 randomized clinical trial has also observed that abrupt interruption of a short-term  
437 treatment with CBD did not induce withdrawal syndrome [72], which is in accordance with  
438 animal studies showing that CBD displays in rodents a comparable motivation to the  
439 consumption of water, for instance [71]. In addition, CBD displays a wide range of  
440 therapeutic effects in different medical and psychological conditions, such as substance  
441 use disorder [73].

442 Recently, a double-blind randomized placebo-controlled trial by Hurd and  
443 coworkers [32] demonstrated a promising and safe effect of CBD on drug-cue-induced  
444 craving in abstinent individuals with heroin use disorder. In comparison to placebo, CBD  
445 treatment reduced cue-induced craving, heart rate and salivary cortisol levels. In addition,  
446 no serious adverse effects were reported in the trial. In non-clinical models of opioid  
447 addiction, CBD has shown efficacy in reducing cue-induced heroin seeking behavior in  
448 rats, in both short (24 hours) and long (2 weeks) periods after administration [35]. In the  
449 conditioned place preference (CPP) paradigm, co-treatment with CBD reduced morphine  
450 induced CPP in mice [34] and rats [74]. Moreover, CBD treatment blocked conditioned  
451 place aversion induced by naloxone injection in rats [74]. In our study, an acute treatment  
452 with CBD (doses of 3, 10 and 30 mg/kg) 10 minutes before the morphine injection on day



453 11 of the protocol, attenuated the significant frequent withdrawal signs of sniffing and  
454 teeth chattering, and the withdrawal sign of body tremors (dose of CBD 10 mg/kg) in  
455 morphine-dependent male rats that received an administration of naloxone. Not  
456 surprisingly, these results corroborate with other studies showing that CBD may produce  
457 U-shaped dose response curves of effect in behavior tests with rodents [75,76] and in  
458 clinical trials evaluating its anxiolytic properties [77]. In oxycodone-precipitated and  
459 spontaneous withdrawal, CBD induced significant reduction of gastrointestinal symptoms  
460 (fecal boli count), in both male and female mice[59]. Lastly, in accordance with our results,  
461 CBD has shown potential to reduce somatic withdrawal signs and mechanical  
462 hyperalgesia in rats during acute and protracted abstinence of another addictive drug  
463 such as nicotine [78].

464 CBD is well known for its wide range of cellular mechanisms [79]. However, studies  
465 have tried to narrow possible mechanisms for CBD's action on opioid-induced addictive  
466 behaviors. For instance, treatment with CBD has shown to provide normalization of AMPA  
467 ( $\alpha$ -amino-3-hydroxy-5-methyl-4-isoxazolepropionic acid) GluR1 and cannabinoid type-1  
468 receptor (CB1) expression in nucleus accumbens, that was once increased by cue-  
469 induced heroin-seeking in rats [35]. Furthermore, CBD treatment inhibited the reward-  
470 facilitating effect of morphine evaluated in the intracranial self-stimulation paradigm. This  
471 effect was blocked by a selective 5-HT1A antagonist injection in the dorsal raphe nucleus,  
472 suggesting a serotonergic mechanism involved in the effect of CBD on the rewarding  
473 effects of opioids[31]. Altogether these results reveal the ability of CBD to interfere in the  
474 rewarding effects of opioids and in the severity of withdrawal signs found in the morphine-  
475 dependent male rats.

476 In our study, CBD significantly reduced withdrawal signs in male rats, but did not  
477 produce attenuation of withdrawal signs in morphine-dependent female rats. As stated  
478 previously, non-clinical studies have demonstrated the higher rewarding effects of opioid  
479 exposure in female rats. Regarding the rewarding effects of morphine itself, Cicero *et al.*  
480 [80] has demonstrated that both male and female rats show the rewarding effects of  
481 morphine through increased conditioned place preference, but only females continue to  
482 show this effect in doses up to 30 mg/kg. Moreover, the oral consumption of water  
483 containing morphine was higher in female rats, in comparison to male rats [46].

484 Intravenous self-administration of opioids, such as morphine and heroin, was also  
485 reported to be greater in female rats than in males in an operant conditioning paradigm  
486 [81]. Although the impact of gonadal hormones was not approached in our protocols,  
487 studies have reported that the presence of estradiol is involved in the development and  
488 in the augmentation of addictive phenotypes in female rats treated with cocaine or  
489 morphine [82–84], which suggests that intact females are reliable to reproduce addictive  
490 behaviors after long-term exposure to opioids.

491 Studies have revealed contrasting results of sex differences in the effects of  
492 cannabinoids. For instance, cannabinoids have shown to produce greater  
493 antinociception, catalepsy, sexual behavior, and anxiety in female, when compared to  
494 male rats [85], but locomotor and thermoregulatory responses remain similar between  
495 both sexes [86]. Furthermore, cannabinoid self-administration has been reported  
496 significant higher in intact female rats, than in male rats, whereas ovariectomized females  
497 were less sensitive to the reinforcing effects of cannabinoids [87]. Overall, there is limited  
498 literature on the sex differences in the effect of CBD on addictive behavior, and further  
499 studies are required to evaluate the mechanisms involved in the sex dependent effect of  
500 CBD in the withdrawal signs of morphine-dependent rats.

501

## 502 **5. Conclusions**

503 Taken together, our findings point to the potential effect of CBD as a treatment for  
504 OIH and withdrawal syndrome in experimental morphine dependence. Our results have  
505 revealed the efficacy of CBD in the treatment of OIH in both male and female rats, as well  
506 as differences in the withdrawal signs precipitated by naloxone injection in male and  
507 female morphine-dependent rats. Importantly, morphine-dependent male and female rats  
508 respond different to a treatment with CBD, which suggests a sex-difference in the  
509 pharmacological effect of this phytocannabinoid in addictive behaviors. Further studies  
510 are necessary to clarify the mechanisms involved in the sex differences observed in the  
511 response to CBD treatment in male and female rodents expressing opioid withdrawal  
512 behavior. Nonetheless, CBD might represent a potential therapeutic target to treat  
513 complications of OUD.

514

515 **Author Contribution**

516 **C.H.A.J, J.V.:** Conceptualization, Formal Analysis, Investigation, Methodology, Project  
517 Administration, Supervision, Visualization, Data Curation, Writing – original draft, Writing  
518 – review and editing. **B.B.S., M.A.R.B., M.V.F.:** Conceptualization, Formal Analysis,  
519 Investigation, Methodology and Data Curation. **F.F.:** Investigation, Methodology and Data  
520 Curation. **K.G., A.S.C., D.E.P.S.:** Funding acquisition, Visualization, Writing – review and  
521 editing. **J.M.C.:** Funding acquisition, Visualization, Project Administration, Supervision,  
522 Writing – review and editing.

523

524

525 **Declaration of competing interest**

526 JASC is a member of the International Advisory Board of the Australian Centre for  
527 Cannabinoid Clinical and Research Excellence (ACRE) – National Health and Medical  
528 Research Council (NHMRC). JASC has received travel support to attend scientific  
529 meetings and personal consultation fees from BSPG-Pharm. JASC is a coinventor of the  
530 patent “Fluorinated CBD compounds, compositions and uses thereof. Pub. No.:  
531 WO/2014/108899. International Application No.: PCT/IL2014/050023,” Def. US number  
532 Reg. 62193296; July 29, 2015; INPI on August 19, 2015 (BR1120150164927; Mechoulam  
533 R, Zuardi AW, Kapczinski F, Hallak JEC, Guimarães FS, Crippa JAS, Breuer A).  
534 Universidade de São Paulo (USP) has licensed this patent to Phytects Pharm (USP  
535 Resolution No. 15.1.130002.1.1) and has an agreement with Prati-Donaduzzi to “develop  
536 a pharmaceutical product containing synthetic CBD and prove its safety and therapeutic  
537 efficacy in the treatment of epilepsy, schizophrenia, Parkinson’s disease, and anxiety  
538 disorders.” JASC is a coinventor of the patent “Cannabinoid-containing oral  
539 pharmaceutical composition, method for preparing and using same,” INPI on September  
540 16th, 2016 (BR 112018005423-2). The other authors declare that they have no conflicts  
541 of interest. JASC is a consultant and/or has received speaker fees and/or sits on the  
542 advisory board and/or receives research funding from Janssen-Cilag, Torrent Pharm,  
543 Prati-Donaduzzi, PurMed Global, and BSPG Pharm over the past 3 years.

544

545

546

547

## 548 **Funding Disclosures**

549

550 This work was supported by the Fundação de Amparo à Pesquisa do Estado de  
551 São Paulo (FAPESP), and by the Instituto Nacional de Ciência e Tecnologia Translational  
552 em Medicina (INCT-TM; CNPq/FAPESP; 2008/09009-2; 2020/ 05416-4). JASC received  
553 a grant from the University Global Partnership Network (UGPN) – Global Priorities in  
554 Cannabinoid Research Excellence Program. JASC is a recipient of CNPq research  
555 fellowships. K. Genaro received in the course of research and assembly of the manuscript  
556 a NARSAD Young Investigator Grant 2019 | The Brain & Behavior Research Foundation.

557

558

## 559 **Aknowledgements**

560 CHAJ, JV, MVF, BBS and MARB are recipients of Coordenação de  
561 Aperfeiçoamento de Pessoal de Nível Superior (CAPES) fellowships (Finance Code 001).  
562 We thank BSPG-Pharm (Sandwich, UK) who kindly donated CBD. The funders had no  
563 role in the design and conduct of the study; collection, management, analysis, and  
564 interpretation of the data; preparation, review, or approval of the manuscript; and decision  
565 to submit the manuscript for publication. All authors read and approved the final  
566 manuscript.

567

## 568 **References**

- 569 1. Dydyk AM, Jain NK, Gupta M. Opioid Use Disorder. *StatPearls*. Published online July  
570 12, 2021.
- 571 2. Buresh M, Stern R, Rastegar D. Treatment of opioid use disorder in primary care. *BMJ*.  
572 2021;373. doi:10.1136/BMJ.N784
- 573 3. Olfson M, Rossen LM, Wall MM, Houry D, Blanco C. Trends in Intentional and  
574 Unintentional Opioid Overdose Deaths in the United States, 2000-2017. *JAMA*.  
575 2019;322(23):2340-2342. doi:10.1001/JAMA.2019.16566
- 576 4. WHO. Opioid overdose. Opioid overdose, World Health Organization. Published 2021.  
577 Accessed December 15, 2021. [https://www.who.int/news-room/fact-sheets/detail/opioid-](https://www.who.int/news-room/fact-sheets/detail/opioid-overdose)  
578 [overdose](https://www.who.int/news-room/fact-sheets/detail/opioid-overdose)
- 579 5. Roth ME, Cosgrove KP, Carroll ME. Sex differences in the vulnerability to drug abuse: a  
580 review of preclinical studies. *Neurosci Biobehav Rev*. 2004;28(6):533-546.  
581 doi:10.1016/J.NEUBIOREV.2004.08.001

- 582 6. Becker JB, McClellan ML, Reed BG. Sex differences, gender and addiction. *J Neurosci*  
583 *Res.* 2017;95(1-2):136. doi:10.1002/JNR.23963
- 584 7. Robinson HL, Banks ML. Adding dopamine to the complexity of sex differences in opioid  
585 reinforcement. *Neuropsychopharmacology* 2021 46:10. 2021;46(10):1705-1706.  
586 doi:10.1038/s41386-021-01060-z
- 587 8. Huhn AS, Tompkins DA, Campbell CM, Dunn KE. Individuals with Chronic Pain Who  
588 Misuse Prescription Opioids Report Sex-Based Differences in Pain and Opioid  
589 Withdrawal. *Pain Med.* 2019;20(10):1942-1947. doi:10.1093/PM/PNY295
- 590 9. Bobzean SAM, Kokane SS, Butler BD, Perrotti LI. Sex differences in the expression of  
591 morphine withdrawal symptoms and associated activity in the tail of the ventral tegmental  
592 area. *Neurosci Lett.* 2019;705:124. doi:10.1016/J.NEULET.2019.04.057
- 593 10. Huhn AS, Berry MS, Dunn KE. Review: Sex-based Differences in Treatment Outcomes  
594 for Persons with Opioid Use Disorder. *Am J Addict.* 2019;28(4):246.  
595 doi:10.1111/AJAD.12921
- 596 11. Enman NM, Reyes BAS, Shi Y, Valentino RJ, Van Bockstaele EJ. Sex differences in  
597 morphine-induced trafficking of mu-opioid and corticotropin-releasing factor receptors in  
598 locus coeruleus neurons. *Brain Res.* 2019;1706:75-85.  
599 doi:10.1016/J.BRAINRES.2018.11.001
- 600 12. Zhou J, Ma R, Jin Y, et al. Molecular mechanisms of opioid tolerance: From opioid  
601 receptors to inflammatory mediators (Review). *Exp Ther Med.* 2021;22(3).  
602 doi:10.3892/ETM.2021.10437
- 603 13. Lowl Y, Clarke2 CF, Huhl BK. Opioid-induced hyperalgesia: a review of epidemiology,  
604 mechanisms and management. *IReview Article Singapore Med J.* 2012;53(5):357-360.
- 605 14. Wilson SH, Hellman KM, James D, Adler AC, Chandrakantan A. Mechanisms, diagnosis,  
606 prevention and management of perioperative opioid-induced hyperalgesia. *Pain Manag.*  
607 2021;11(4):405-417. doi:10.2217/PMT-2020-0105
- 608 15. Doherty M, White JM, Somogyi AA, Bochner F, Ali R, Ling W. Hyperalgesic responses  
609 in methadone maintenance patients. *Pain.* 2001;90(1-2):91-96. doi:10.1016/S0304-  
610 3959(00)00391-2
- 611 16. Comer S, Cunningham C, Fishman MJ, et al. *National Practice Guideline for the Use of*  
612 *Medications in the Treatment of Addiction Involving Opioid Use ASAM.*; 2015.
- 613 17. Srivastava AB, Mariani JJ, Levin FR. New directions in the treatment of opioid  
614 withdrawal. *The Lancet.* 2020;395(10241):1938-1948. doi:10.1016/S0140-  
615 6736(20)30852-7
- 616 18. Graczyk M, Łukowicz M, Dzierzanowski T. Prospects for the Use of Cannabinoids in  
617 Psychiatric Disorders. *Front Psychiatry.* 2021;12:276.  
618 doi:10.3389/FPSYT.2021.620073/BIBTEX
- 619 19. Singh ME, Verty ANA, McGregor IS, Mallet PE. A cannabinoid receptor antagonist  
620 attenuates conditioned place preference but not behavioural sensitization to morphine.  
621 *Brain Res.* 2004;1026(2):244-253. doi:10.1016/J.BRAINRES.2004.08.027
- 622 20. Braida D, Iosùè S, Pegorini S, Sala M.  $\Delta$ 9-Tetrahydrocannabinol-induced conditioned  
623 place preference and intracerebroventricular self-administration in rats. *Eur J Pharmacol.*  
624 2004;506(1):63-69. doi:10.1016/J.EJPHAR.2004.10.043
- 625 21. Gossop M, Battersby M, Strang J. Self-detoxification by opiate addicts. A preliminary  
626 investigation. *Br J Psychiatry.* 1991;159(AUG.):208-212. doi:10.1192/BJP.159.2.208



- 627 22. Epstein DH, Preston KL. No Evidence for Reduction of Opioid-Withdrawal Symptoms by  
628 Cannabis Smoking During a Methadone Dose Taper. *Am J Addict.* 2015;24(4):323.  
629 doi:10.1111/AJAD.12183
- 630 23. Fattore L, Deiana S, Spano SM, et al. Endocannabinoid system and opioid addiction:  
631 Behavioural aspects. *Pharmacol Biochem Behav.* 2005;81(2):343-359.  
632 doi:10.1016/J.PBB.2005.01.031
- 633 24. Atalay S, Jarocka-Karpowicz I, Skrzydlewska E. Antioxidative and Anti-Inflammatory  
634 Properties of Cannabidiol. *Antioxidants.* 2020;9(1). doi:10.3390/ANTIOX9010021
- 635 25. Lim K, See YM, Lee J. A Systematic Review of the Effectiveness of Medical Cannabis  
636 for Psychiatric, Movement and Neurodegenerative Disorders. *Clinical*  
637 *Psychopharmacology and Neuroscience.* 2017;15(4):301.  
638 doi:10.9758/CPN.2017.15.4.301
- 639 26. Chaves YC, Genaro K, Crippa JA, da Cunha JM, Zanoveli JM. Cannabidiol induces  
640 antidepressant and anxiolytic-like effects in experimental type-1 diabetic animals by  
641 multiple sites of action. *Metab Brain Dis.* 2021;36(4):639-652. doi:10.1007/S11011-020-  
642 00667-3/TABLES/2
- 643 27. Viudez-Martínez A, García-Gutiérrez MS, Navarrón CM, et al. Cannabidiol reduces  
644 ethanol consumption, motivation and relapse in mice. *Addiction biology.* 2018;23(1):154-  
645 164. doi:10.1111/ADB.12495
- 646 28. Castillo-Arellano J, Canseco-Alba A, Cutler SJ, León F. The Polypharmacological Effects  
647 of Cannabidiol. *Molecules.* 2023;28(7). doi:10.3390/MOLECULES28073271
- 648 29. Galaj E, Bi GH, Yang HJ, Xi ZX. Cannabidiol attenuates the rewarding effects of cocaine  
649 in rats by CB2, 5-HT1A and TRPV1 receptor mechanisms. *Neuropharmacology.*  
650 2020;167. doi:10.1016/J.NEUROPHARM.2019.107740
- 651 30. Luján MÁ, Castro-Zavala A, Alegre-Zurano L, Valverde O. Repeated Cannabidiol  
652 treatment reduces cocaine intake and modulates neural proliferation and CB1R expression  
653 in the mouse hippocampus. *Neuropharmacology.* 2018;143:163-175.  
654 doi:10.1016/J.NEUROPHARM.2018.09.043
- 655 31. Katsidoni V, Anagnostou I, Panagis G. Cannabidiol inhibits the reward-facilitating effect  
656 of morphine: involvement of 5-HT 1A receptors in the dorsal raphe nucleus. *Addiction*  
657 *Biology.* 2012;18(2):286-296. doi:10.1111/j.1369-1600.2012.00483.x
- 658 32. Hurd YL, Spriggs S, Alishayev J, et al. Cannabidiol for the reduction of cue-induced  
659 craving and anxiety in drug-abstinent individuals with heroin use disorder: A double-blind  
660 randomized placebo-controlled trial. *American Journal of Psychiatry.* 2019;176(11):911-  
661 922. doi:10.1176/appi.ajp.2019.18101191
- 662 33. Bhargava HN. Effect of some cannabinoids on naloxone-precipitated abstinence in  
663 morphine-dependent mice. *Psychopharmacology* 1976 49:3. 1976;49(3):267-270.  
664 doi:10.1007/BF00426828
- 665 34. Markos JR, Harris HM, Gul W, Elsohly MA, Sufka KJ. Effects of Cannabidiol on  
666 Morphine Conditioned Place Preference in Mice. *Planta Med.* 2018;84(4):221-224.  
667 doi:10.1055/s-0043-117838
- 668 35. Ren Y, Whittard J, Higuera-Matas A, Morris C V., Hurd YL. Cannabidiol, a  
669 Nonpsychotropic Component of Cannabis, Inhibits Cue-Induced Heroin Seeking and  
670 Normalizes Discrete Mesolimbic Neuronal Disturbances. *The Journal of Neuroscience.*  
671 2009;29(47):14764. doi:10.1523/JNEUROSCI.4291-09.2009

- 672 36. McLean S, Bruno R, Brandon S, de Graaff B. Effect of filtration on morphine and particle  
673 content of injections prepared from slow-release oral morphine tablets. *Harm Reduct J.*  
674 2009;6(1):1-13. doi:10.1186/1477-7517-6-37/FIGURES/7
- 675 37. Keijzer L. Reducing harm through the development of good preparation practices for the  
676 injection of slow release morphine sulphate capsules. *Harm Reduct J.* 2020;17(1):1-9.  
677 doi:10.1186/S12954-020-00389-W/TABLES/1
- 678 38. National Center for Biotechnology Information. PubChem Compound Summary for CID  
679 5288826, Morphine. Published 2021.  
680 <https://pubchem.ncbi.nlm.nih.gov/compound/Morphine>.
- 681 39. Zamani N, Hassanian-Moghaddam H, Bayat A, et al. Reversal of opioid overdose  
682 syndrome in morphine-dependent rats using buprenorphine. *Toxicol Lett.*  
683 2015;232(3):590-594. doi:10.1016/j.toxlet.2014.12.007
- 684 40. Datta U, Kelley LK, Middleton JW, Gilpin NW. Positive allosteric modulation of the  
685 cannabinoid type-1 receptor (CB1R) in periaqueductal gray (PAG) antagonizes anti-  
686 nociceptive and cellular effects of a mu-opioid receptor agonist in morphine-withdrawn  
687 rats. *Psychopharmacology (Berl.)*. 2020;237(12):3729-3739. doi:10.1007/S00213-020-  
688 05650-5
- 689 41. Pacheco SDG, Gasparin AT, Jesus CHA, et al. Antinociceptive and Anti-Inflammatory  
690 Effects of Bixin, a Carotenoid Extracted from the Seeds of *Bixa orellana*. *Planta Med.*  
691 2019;85(16):1216-1224.
- 692 42. Genaro K, Fabris D, Arantes ALF, Zuardi AW, Crippa JAS, Prado WA. Cannabidiol Is a  
693 Potential Therapeutic for the Affective-Motivational Dimension of Incision Pain in Rats.  
694 *Front Pharmacol.* 2017;8:391. doi:10.3389/fphar.2017.00391
- 695 43. Jesus CHA, Redivo DDB, Gasparin AT, et al. Cannabidiol attenuates mechanical  
696 allodynia in streptozotocin-induced diabetic rats via serotonergic system activation  
697 through 5-HT1A receptors. *Brain Res.* 2019;1715:156-164.  
698 doi:10.1016/J.BRAINRES.2019.03.014
- 699 44. Wang F, Meng J, Zhang L, Johnson T, Chen C, Roy S. Morphine induces changes in the  
700 gut microbiome and metabolome in a morphine dependence model. *Scientific Reports*  
701 2018 8:1. 2018;8(1):1-15. doi:10.1038/s41598-018-21915-8
- 702 45. Vardanyan A, Wang R, Vanderah TW, et al. TRPV1 receptor in expression of opioid-  
703 induced hyperalgesia. *J Pain.* 2009;10(3):243-252. doi:10.1016/J.JPAIN.2008.07.004
- 704 46. Alexander BK, Coombs RB, Hadaway PF. The effect of housing and gender on morphine  
705 self-administration in rats. *Psychopharmacology 1978* 58:2. 1978;58(2):175-179.  
706 doi:10.1007/BF00426903
- 707 47. Rezaei Z, Kourosch-Arami M, Azizi H, Semnanian S. Orexin type-1 receptor inhibition in  
708 the rat lateral paraventricular nucleus attenuates development of morphine  
709 dependence. *Neurosci Lett.* 2020;724. doi:10.1016/j.neulet.2020.134875
- 710 48. Ferrini F, Lorenzo LE, Godin AG, Quang M Le, De Koninck Y. Enhancing KCC2  
711 function counteracts morphine-induced hyperalgesia. *Scientific Reports 2017* 7:1.  
712 2017;7(1):1-8. doi:10.1038/s41598-017-04209-3
- 713 49. Holtman JR, Wala EP. Characterization of morphine-induced hyperalgesia in male and  
714 female rats. *Pain.* 2005;114(1-2):62-70. doi:10.1016/J.PAIN.2004.11.014
- 715 50. Juni A, Klein G, Kowalczyk B, Ragnauth A, Kest B. Sex differences in hyperalgesia  
716 during morphine infusion: effect of gonadectomy and estrogen treatment.  
717 *Neuropharmacology.* 2008;54(8):1264-1270. doi:10.1016/J.NEUROPHARM.2008.04.004



- 718 51. Bodnar RJ, Kest B. Sex differences in opioid analgesia, hyperalgesia, tolerance and  
719 withdrawal: Central mechanisms of action and roles of gonadal hormones. *Horm Behav.*  
720 2010;58(1):72-81. doi:10.1016/J.YHBEH.2009.09.012
- 721 52. Ward SJ, McAllister SD, Kawamura R, Murase R, Neelakantan H, Walker EA.  
722 Cannabidiol inhibits paclitaxel-induced neuropathic pain through 5-HT 1A receptors  
723 without diminishing nervous system function or chemotherapy efficacy. *Br J Pharmacol.*  
724 2014;171(3):636-645. doi:10.1111/bph.12439
- 725 53. Costa B, Giagnoni G, Franke C, Trovato AE, Colleoni M. Vanilloid TRPV1 receptor  
726 mediates the antihyperalgesic effect of the nonpsychoactive cannabinoid, cannabidiol, in a  
727 rat model of acute inflammation. *Br J Pharmacol.* 2004;143(2):247-250.  
728 doi:10.1038/sj.bjp.0705920
- 729 54. Costa B, Trovato AE, Comelli F, Giagnoni G, Colleoni M. The non-psychoactive  
730 cannabis constituent cannabidiol is an orally effective therapeutic agent in rat chronic  
731 inflammatory and neuropathic pain. *Eur J Pharmacol.* 2007;556(1-3):75-83.  
732 doi:10.1016/j.ejphar.2006.11.006
- 733 55. Shah M, Huecker MR. Opioid Withdrawal. *Challenging Cases and Complication*  
734 *Management in Pain Medicine.* Published online October 11, 2021:15-20.
- 735 56. American Addiction Centers. Opioid Withdrawal: Signs, Symptoms & Addiction  
736 Treatment. Published online 2021.
- 737 57. Bruneau A, Frimerman L, Verner M, et al. Day-to-day opioid withdrawal symptoms,  
738 psychological distress, and opioid craving in patients with chronic pain prescribed opioid  
739 therapy. *Drug Alcohol Depend.* 2021;225:108787.  
740 doi:10.1016/J.DRUGALCDEP.2021.108787
- 741 58. Uddin O, Jenne C, Fox ME, Arakawa K, Keller A, Cramer N. Divergent profiles of  
742 fentanyl withdrawal and associated pain in mice and rats. *bioRxiv.* Published online  
743 November 16, 2020:2020.11.16.384818. doi:10.1101/2020.11.16.384818
- 744 59. Scicluna RL, Wilson BB, Thelaus SH, Arnold JC, McGregor IS, Bowen MT. Cannabidiol  
745 Reduced the Severity of Gastrointestinal Symptoms of Opioid Withdrawal in Male and  
746 Female Mice. <https://home.liebertpub.com/can>. Published online December 27, 2022.  
747 doi:10.1089/CAN.2022.0036
- 748 60. Azizi H, Ranjbar-Slamloo Y, Semnani S. Height-dependent difference in the expression  
749 of naloxone-induced withdrawal jumping behavior in morphine dependent rats. *Neurosci*  
750 *Lett.* 2012;515(2):174-176. doi:10.1016/J.NEULET.2012.03.047
- 751 61. Shansky RM, Murphy AZ. Considering sex as a biological variable will require a global  
752 shift in science culture. *Nature Neuroscience* 2021 24:4. 2021;24(4):457-464.  
753 doi:10.1038/s41593-021-00806-8
- 754 62. Gruene T, Flick K, Stefano A, Shea S, Shansky R. Sexually divergent expression of active  
755 and passive conditioned fear responses in rats. *Elife.* 2015;4. doi:10.7554/ELIFE.11352
- 756 63. Tan S, Xue S, Behnood-Rod A, et al. Sex differences in the reward deficit and somatic  
757 signs associated with precipitated nicotine withdrawal in rats. *Neuropharmacology.*  
758 2019;160:107756. doi:10.1016/J.NEUROPHARM.2019.107756
- 759 64. Kokane SS, Perrotti LI. Sex Differences and the Role of Estradiol in Mesolimbic Reward  
760 Circuits and Vulnerability to Cocaine and Opiate Addiction. *Front Behav Neurosci.*  
761 2020;14:74. doi:10.3389/FNBEH.2020.00074/BIBTEX
- 762 65. Wiese B, Wilson-Poe AR. Emerging Evidence for Cannabis' Role in Opioid Use  
763 Disorder. *Cannabis Cannabinoid Res.* 2018;3(1):179. doi:10.1089/CAN.2018.0022

- 764 66. Sagheddu C, Muntoni AL, Pistis M, Melis M. Endocannabinoid Signaling in Motivation,  
765 Reward, and Addiction: Influences on Mesocorticolimbic Dopamine Function. *Int Rev*  
766 *Neurobiol.* 2015;125:257-302. doi:10.1016/BS.IRN.2015.10.004
- 767 67. Yamaguchi T, Hagiwara Y, Tanaka H, et al. Endogenous cannabinoid, 2-  
768 arachidonoylglycerol, attenuates naloxone-precipitated withdrawal signs in morphine-  
769 dependent mice. *Brain Res.* 2001;909(1-2):121-126. doi:10.1016/S0006-8993(01)02655-5
- 770 68. Lichtman AH, Fisher J, Martin BR. Precipitated cannabinoid withdrawal is reversed by  
771  $\Delta$ 9-tetrahydrocannabinol or clonidine. *Pharmacol Biochem Behav.* 2001;69(1-2):181-188.  
772 doi:10.1016/S0091-3057(01)00514-7
- 773 69. McPartland JM, Duncan M, Di Marzo V, Pertwee RG. Are cannabidiol and  $\Delta$ (9) -  
774 tetrahydrocannabivarin negative modulators of the endocannabinoid system? A systematic  
775 review. *Br J Pharmacol.* 2015;172(3):737-753. doi:10.1111/BPH.12944
- 776 70. Parker LA, Burton P, Sorge RE, Yakiwchuk C, Mechoulam R. Effect of low doses of  
777 delta9-tetrahydrocannabinol and cannabidiol on the extinction of cocaine-induced and  
778 amphetamine-induced conditioned place preference learning in rats. *Psychopharmacology*  
779 *(Berl).* 2004;175(3):360-366. doi:10.1007/S00213-004-1825-7
- 780 71. Viudez-Martínez A, García-Gutiérrez MS, Medrano-Relinque J, Navarrón CM, Navarrete  
781 F, Manzanares J. Cannabidiol does not display drug abuse potential in mice behavior. *Acta*  
782 *Pharmacol Sin.* 2019;40(3):358. doi:10.1038/S41401-018-0032-8
- 783 72. Taylor L, Crockett J, Tayo B, Checketts D, Sommerville K. Abrupt withdrawal of  
784 cannabidiol (CBD): A randomized trial. *Epilepsy Behav.* 2020;104(Pt A).  
785 doi:10.1016/J.YEBEH.2020.106938
- 786 73. Galaj E, Xi ZX. Possible Receptor Mechanisms Underlying Cannabidiol Effects on  
787 Addictive-like Behaviors in Experimental Animals. *Int J Mol Sci.* 2021;22(1):1-14.  
788 doi:10.3390/IJMS22010134
- 789 74. de Carvalho CR, Takahashi RN. Cannabidiol disrupts the reconsolidation of contextual  
790 drug-associated memories in Wistar rats. *Addiction Biology.* Published online 2017.  
791 doi:10.1111/adb.12366
- 792 75. Peres FF, Levin R, Suiama MA, et al. Cannabidiol prevents motor and cognitive  
793 impairments induced by reserpine in rats. *Front Pharmacol.* 2016;7(SEP):343.  
794 doi:10.3389/FPHAR.2016.00343/BIBTEX
- 795 76. Nedelescu H, Wagner GE, De Ness GL, et al. Cannabidiol Produces Distinct U-Shaped  
796 Dose-Response Effects on Cocaine-Induced Conditioned Place Preference and Associated  
797 Recruitment of Prelimbic Neurons in Male Rats. *Biological Psychiatry Global Open*  
798 *Science.* Published online July 7, 2021. doi:10.1016/J.BPSGOS.2021.06.014
- 799 77. Linares IM, Zuardi AW, Pereira LC, et al. Cannabidiol presents an inverted U-shaped  
800 dose-response curve in a simulated public speaking test. *Braz J Psychiatry.* 2019;41(1):9-  
801 14. doi:10.1590/1516-4446-2017-0015
- 802 78. Smith LC, Tieu L, Suhandynata RT, et al. Cannabidiol reduces withdrawal symptoms in  
803 nicotine-dependent rats. *Psychopharmacology (Berl).* 2021;238(8):2201-2211.  
804 doi:10.1007/S00213-021-05845-4/FIGURES/5
- 805 79. Ożarowski M, Karpiński TM, Zielińska A, Souto EB, Wielgus K. Cannabidiol in  
806 Neurological and Neoplastic Diseases: Latest Developments on the Molecular Mechanism  
807 of Action. *International Journal of Molecular Sciences 2021, Vol 22, Page 4294.*  
808 2021;22(9):4294. doi:10.3390/IJMS22094294

- 809 80. Cicero TJ, Ennis T, Ogden J, Meyer ER. Gender differences in the reinforcing properties  
810 of morphine. *Pharmacol Biochem Behav.* 2000;65(1):91-96. doi:10.1016/S0091-  
811 3057(99)00174-4
- 812 81. Cicero TJ, Aylward SC, Meyer ER. Gender differences in the intravenous self-  
813 administration of mu opiate agonists. *Pharmacol Biochem Behav.* 2003;74(3):541-549.  
814 doi:10.1016/S0091-3057(02)01039-0
- 815 82. Ramôa CP, Doyle SE, Naim DW, Lynch WJ. Estradiol as a Mechanism for Sex  
816 Differences in the Development of an Addicted Phenotype following Extended Access  
817 Cocaine Self-Administration. *Neuropsychopharmacology* 2013 38:9. 2013;38(9):1698-  
818 1705. doi:10.1038/npp.2013.68
- 819 83. Mirbaha H, Tabaeizadeh M, Shaterian-Mohammadi H, Tahsili-Fahadan P, Dehpour AR.  
820 Estrogen pretreatment modulates morphine-induced conditioned place preference in  
821 ovariectomized mice. *Pharmacol Biochem Behav.* 2009;92(3):399-403.  
822 doi:10.1016/J.PBB.2009.01.009
- 823 84. Roth ME, Casimir AG, Carroll ME. Influence of estrogen in the acquisition of  
824 intravenously self-administered heroin in female rats. *Pharmacol Biochem Behav.*  
825 2002;72(1-2):313-318. doi:10.1016/S0091-3057(01)00777-8
- 826 85. Fattore L, Fratta W. How important are sex differences in cannabinoid action? *Br J*  
827 *Pharmacol.* 2010;160(3):544. doi:10.1111/J.1476-5381.2010.00776.X
- 828 86. Javadi-Paydar M, Nguyen JD, Kerr TM, et al. Effects of  $\Delta^9$ -THC and cannabidiol vapor  
829 inhalation in male and female rats. *Psychopharmacology (Berl).* 2018;235(9):2541.  
830 doi:10.1007/S00213-018-4946-0
- 831 87. Fattore L, Spano MS, Altea S, Angius F, Fadda P, Fratta W. Cannabinoid self-  
832 administration in rats: sex differences and the influence of ovarian function. *Br J*  
833 *Pharmacol.* 2007;152(5):795. doi:10.1038/SJ.BJP.0707465

834

## 835 **Figure legends**

836

837 **Figure 1.** Morphine calibration curve (n=9) at 285 nm absorbance (A), and the UV-Vis  
838 spectra of one of its replicates, with concentration ranging from 0.01 to 0.1 mg/mL (B).

839

840 **Figure 2.** (A) Timeline of the experimental protocols. (B) Effect of CBD treatment in  
841 morphine-induced hyperalgesia in male and (B) female rats (C) and evaluation of thermal  
842 latency in male and female rats treated with morphine or water on (D) day 7 and (E) day  
843 10 after the beginning of treatments. Groups of male and female Wistar rats treated with  
844 CBD (3, 10 or 30 mg/kg; i.p.) before every injection of morphine (s.c.) for 10 days were  
845 evaluated in the hot plate test before (baseline, BL), and 2, 4, 7 and 10 days after initial  
846 treatment with morphine. Data are expressed as mean  $\pm$  SEM, n=8-11 per group. #  
847 indicates p<0.05 when compared to the respective group treated with water (Veh+Water).

848 \* indicates  $p < 0.05$  when compared to the respective group treated with morphine  
849 (Veh+Mor). Two-way ANOVA followed by Bonferroni's multiple comparison test.

850

851 **Figure 3.** Withdrawal signs induced by naloxone injection (2 mg/kg, s.c.) in male and  
852 female morphine-dependent rats. Wistar rats treated with morphine (s.c.) for 10 days  
853 (Mor; n=8) were compared to the control group treated with distilled water (Water; n=8)  
854 in the number of withdrawal signs such as rearing, defecation, sniffing, teeth chattering,  
855 grooming, digging, body tremor and jumping. Data are expressed as mean  $\pm$  SEM. \*  
856 indicates  $p < 0.05$  when compared to the respective control group treated with water. #  
857 indicates  $p < 0.05$  when compared to the respective male group treated with morphine  
858 (Mor). n.s. indicates  $p > 0.05$ . Two-way ANOVA followed by Bonferroni's multiple  
859 comparison test.

860

861 **Figure 4.** Effect of CBD treatment in the withdrawal signs rearing, defecation, sniffing,  
862 teeth chattering, grooming, digging, body tremor and jumping in male morphine-  
863 dependent rats. Groups of male Wistar rats treated with CBD (3, 10 or 30 mg/kg; i.p.)  
864 before every injection of morphine (s.c.) for 10 days were compared to the control group  
865 treated with vehicle (Veh-Mor). Data are expressed as mean  $\pm$  SEM, n=8-10 per group. \*  
866 indicates  $p < 0.05$ . One-way ANOVA followed by Bonferroni's multiple comparison test.

867

868 **Figure 5.** Effect of CBD treatment in the withdrawal signs of rearing, defecation, sniffing,  
869 teeth chattering, grooming, digging, body tremor and jumping in female morphine-  
870 dependent rats. Groups of female Wistar rats treated with CBD (3, 10 or 30 mg/kg; i.p.)  
871 before every injection of morphine (s.c.) for 10 days were compared to the control group  
872 treated with vehicle (Veh-Mor). Data are expressed as mean  $\pm$  SEM, n=9-11 per group. \*  
873 indicates  $p < 0.05$ . One-way ANOVA followed by Bonferroni's multiple comparison test.

874

875

876

877

878

879 **Table 1.** Values of Two-way ANOVA analysis of naloxone-precipitated withdrawal signs  
 880 (treatment, sex and interaction between these factors).

| Withdrawal sign  | Treatment       |                       | Sex            |                    | Interaction    |            |
|------------------|-----------------|-----------------------|----------------|--------------------|----------------|------------|
|                  | F (DFn, DFd)    | p value               | F (DFn, DFd)   | p value            | F (DFn, DFd)   | p value    |
| Grooming         | (1, 28) = 0.001 | p = 0.9699            | (1, 28) = 0.11 | p = 0.7344         | (1, 28) = 0.63 | p = 0.4307 |
| Digging          | (1, 28) = 13.04 | <b>p = 0.0012*</b>    | (1, 28) = 1.38 | p = 0.2496         | (1, 28) = 1.38 | p = 0.2496 |
| Defecation       | (1, 28) = 136.2 | <b>p &lt; 0.0001*</b> | (1, 28) = 3.58 | p = 0.0686         | (1, 28) = 2.33 | p = 0.1378 |
| Rearing          | (1, 28) = 7.98  | <b>p = 0.0086*</b>    | (1, 28) = 4.32 | <b>p = 0.0469*</b> | (1, 28) = 2.74 | p = 0.1088 |
| Sniffing         | (1, 28) = 8.65  | <b>p = 0.0065*</b>    | (1, 28) = 4.44 | <b>p = 0.0440*</b> | (1, 28) = 3.54 | p = 0.0703 |
| Teeth Chattering | (1, 28) = 25.64 | <b>p &lt; 0.0001*</b> | (1, 28) = 3.11 | p = 0.0885         | (1, 28) = 2.91 | p = 0.0989 |
| Body tremor      | (1, 28) = 27.61 | <b>p &lt; 0.0001*</b> | (1, 28) = 0.57 | p = 0.4550         | (1, 28) = 0.01 | p = 0.9036 |
| Jumping          | (1, 28) = 6.84  | <b>p = 0.0142*</b>    | (1, 28) = 1.63 | p = 0.2119         | (1, 28) = 0.09 | p = 0.7632 |

881

882

883

884

885

886

887

888

889

890

891

892

893

894

895

896

897

898 **Table 2.** Estimate mean percentage of each withdrawal sign from the total number of  
899 withdrawal signs during the test period (morphine-dependent group only).

| <b>Withdrawal sign</b> | <b>Male</b>  | <b>Female</b> | <b>p value</b> |
|------------------------|--------------|---------------|----------------|
| Grooming               | 3.68 ± 1.16  | 5.67 ± 1.31   | 0.2771         |
| Rearing                | 14.68 ± 1.72 | 30.53 ± 3.46  | <b>0.0011*</b> |
| Defecation             | 8.18 ± 1.18  | 12.60 ± 1.57  | <b>0.0412*</b> |
| Digging                | 14.15 ± 4.29 | 9.38 ± 2.92   | 0.3670         |
| Sniffing               | 17.20 ± 6.12 | 5.95 ± 1.91   | 0.1013         |
| Teeth chattering       | 29.04 ± 4.84 | 19.15 ± 6.25  | 0.2316         |
| Body tremor            | 10.24 ± 1.76 | 12.52 ± 2.70  | 0.4917         |
| Jumping                | 2.83 ± 0.77  | 4.28 ± 1.60   | 0.4304         |

900

901

902

903

904

905

906

907

908

909

910

911

912

913

914

915

916

917

918

919

920

921 **Figure 1.**

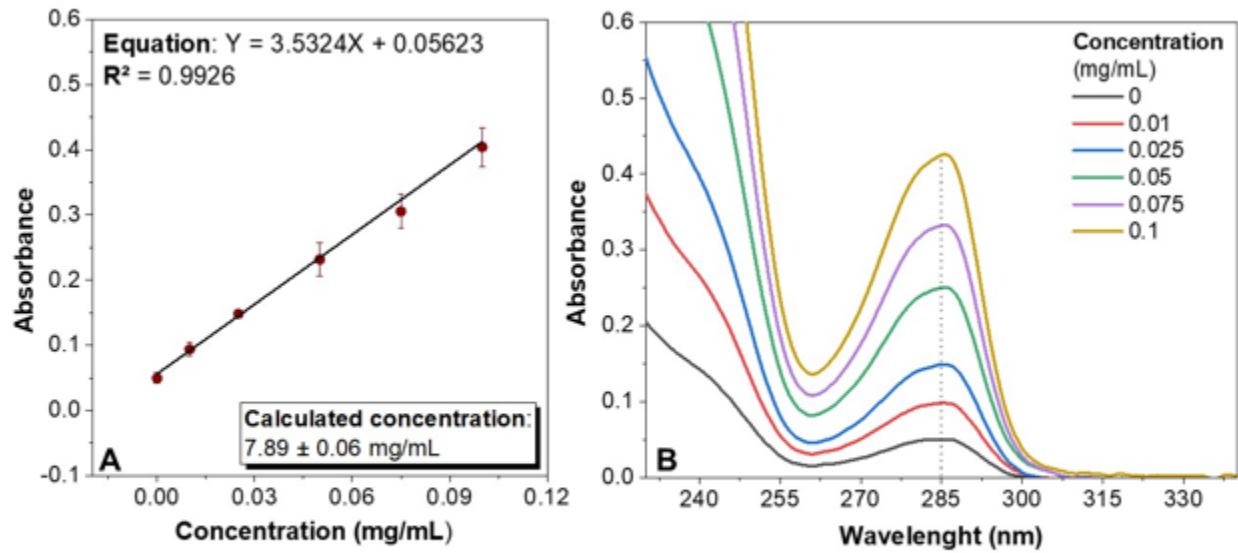

922

923

924

925

926

927

928

929

930

931

932

933

934

935

936

937

938



939 **Figure 2.**

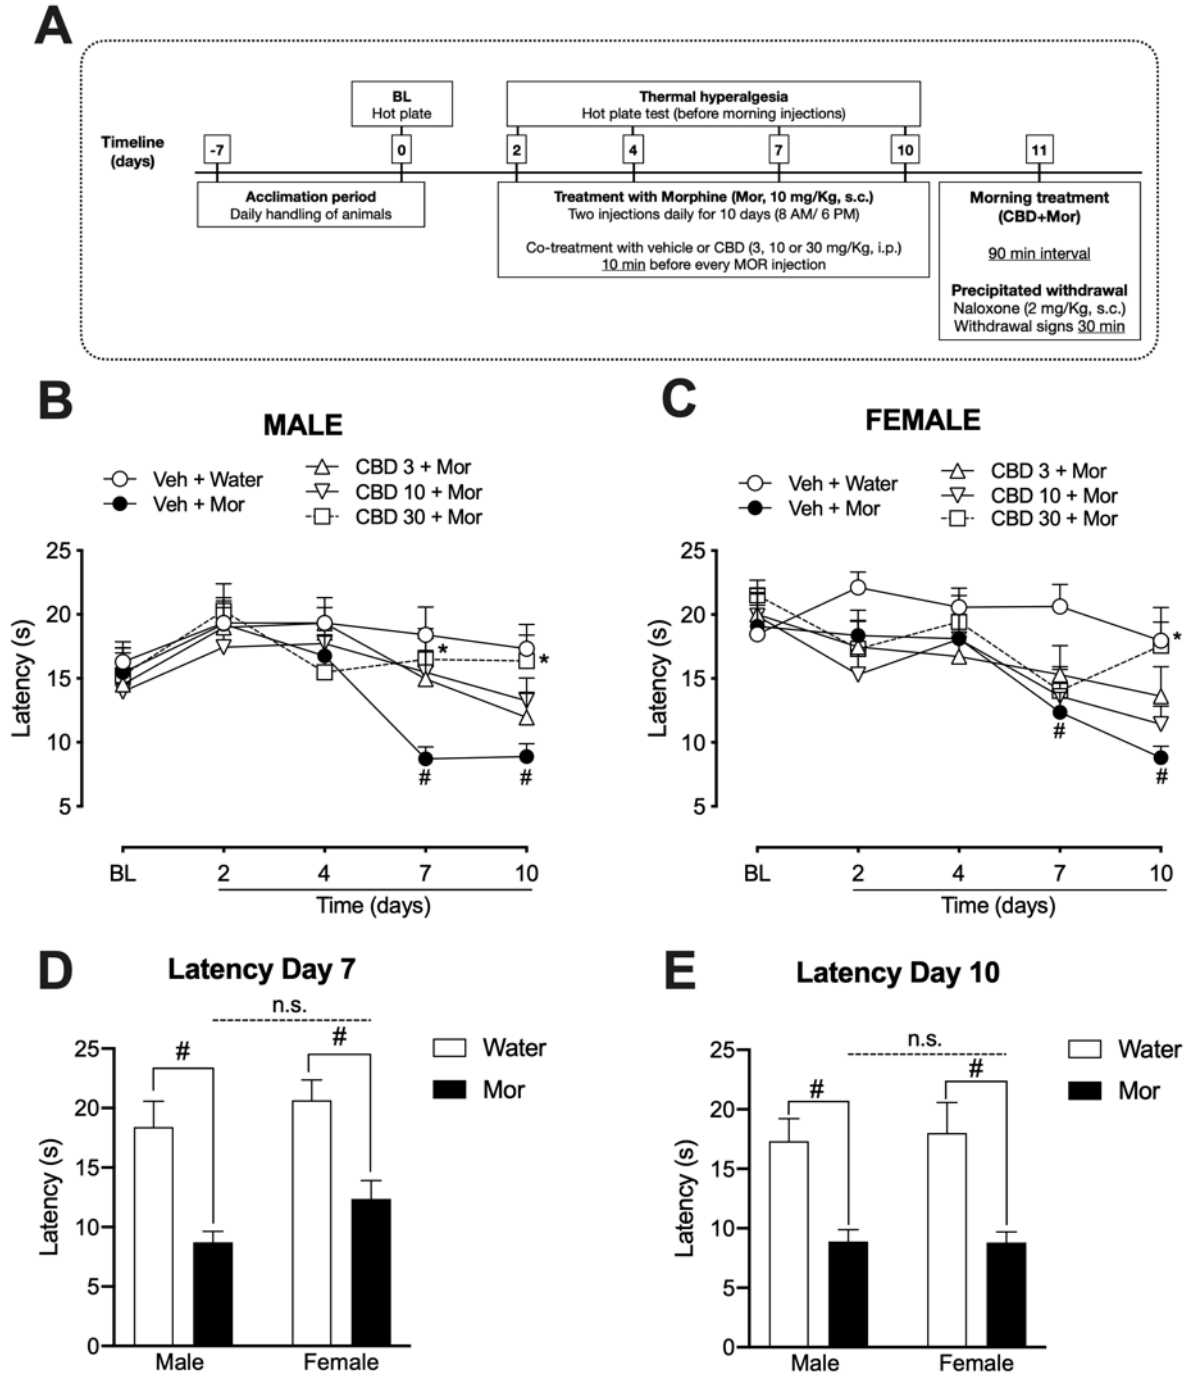

940

941

942

943

944

945 **Figure 3.**

946

947

948

949

950

951

952

953

954

955

956

957

958

959

960

961

962

963

964

965

966

967

968

969

970

971

972

973

974

975

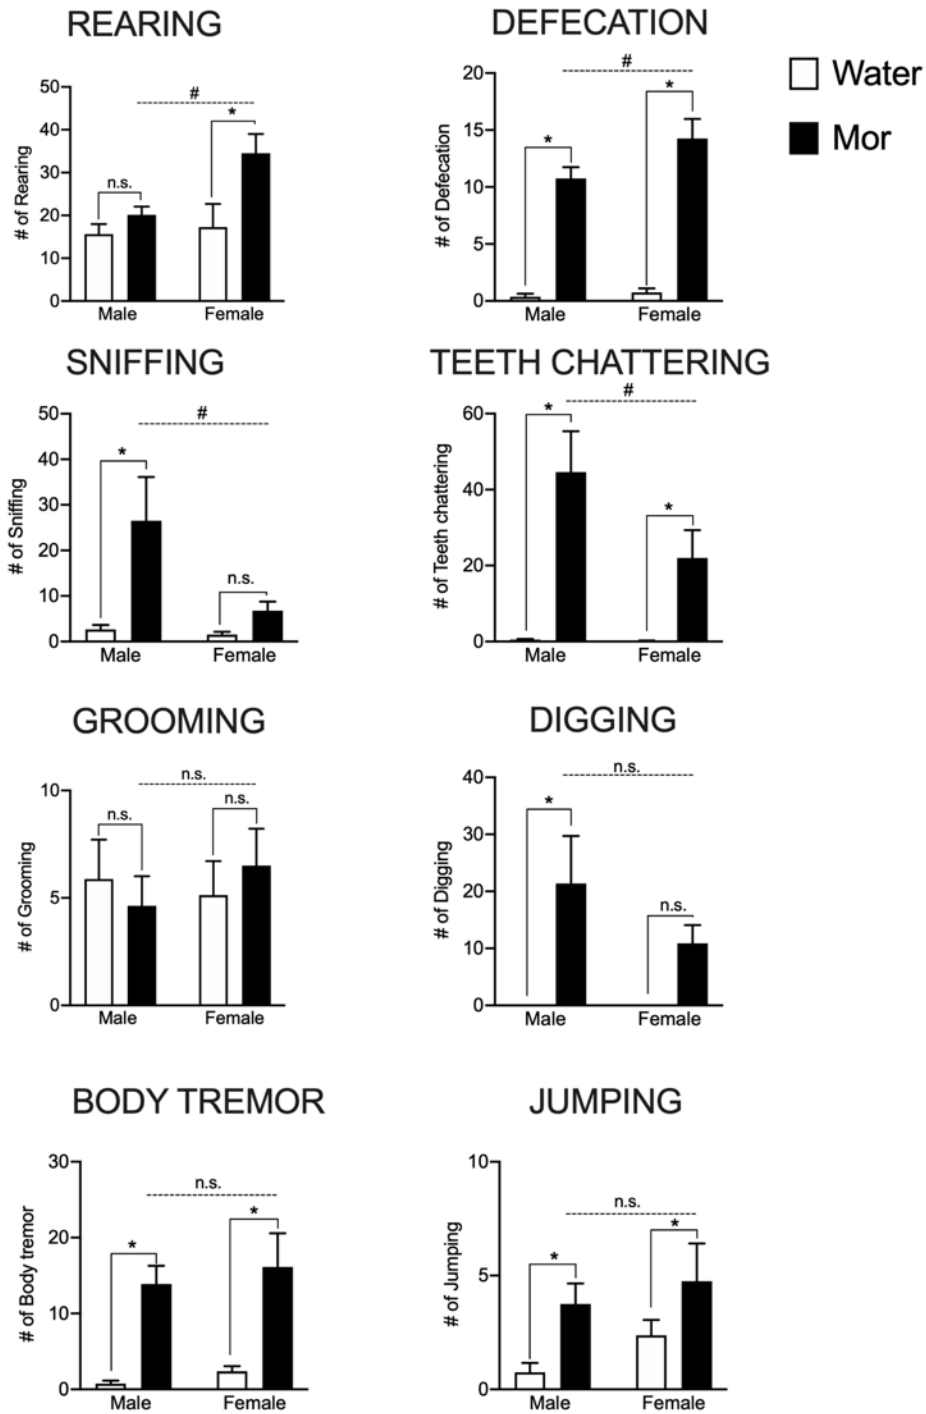

976 **Figure 4.**

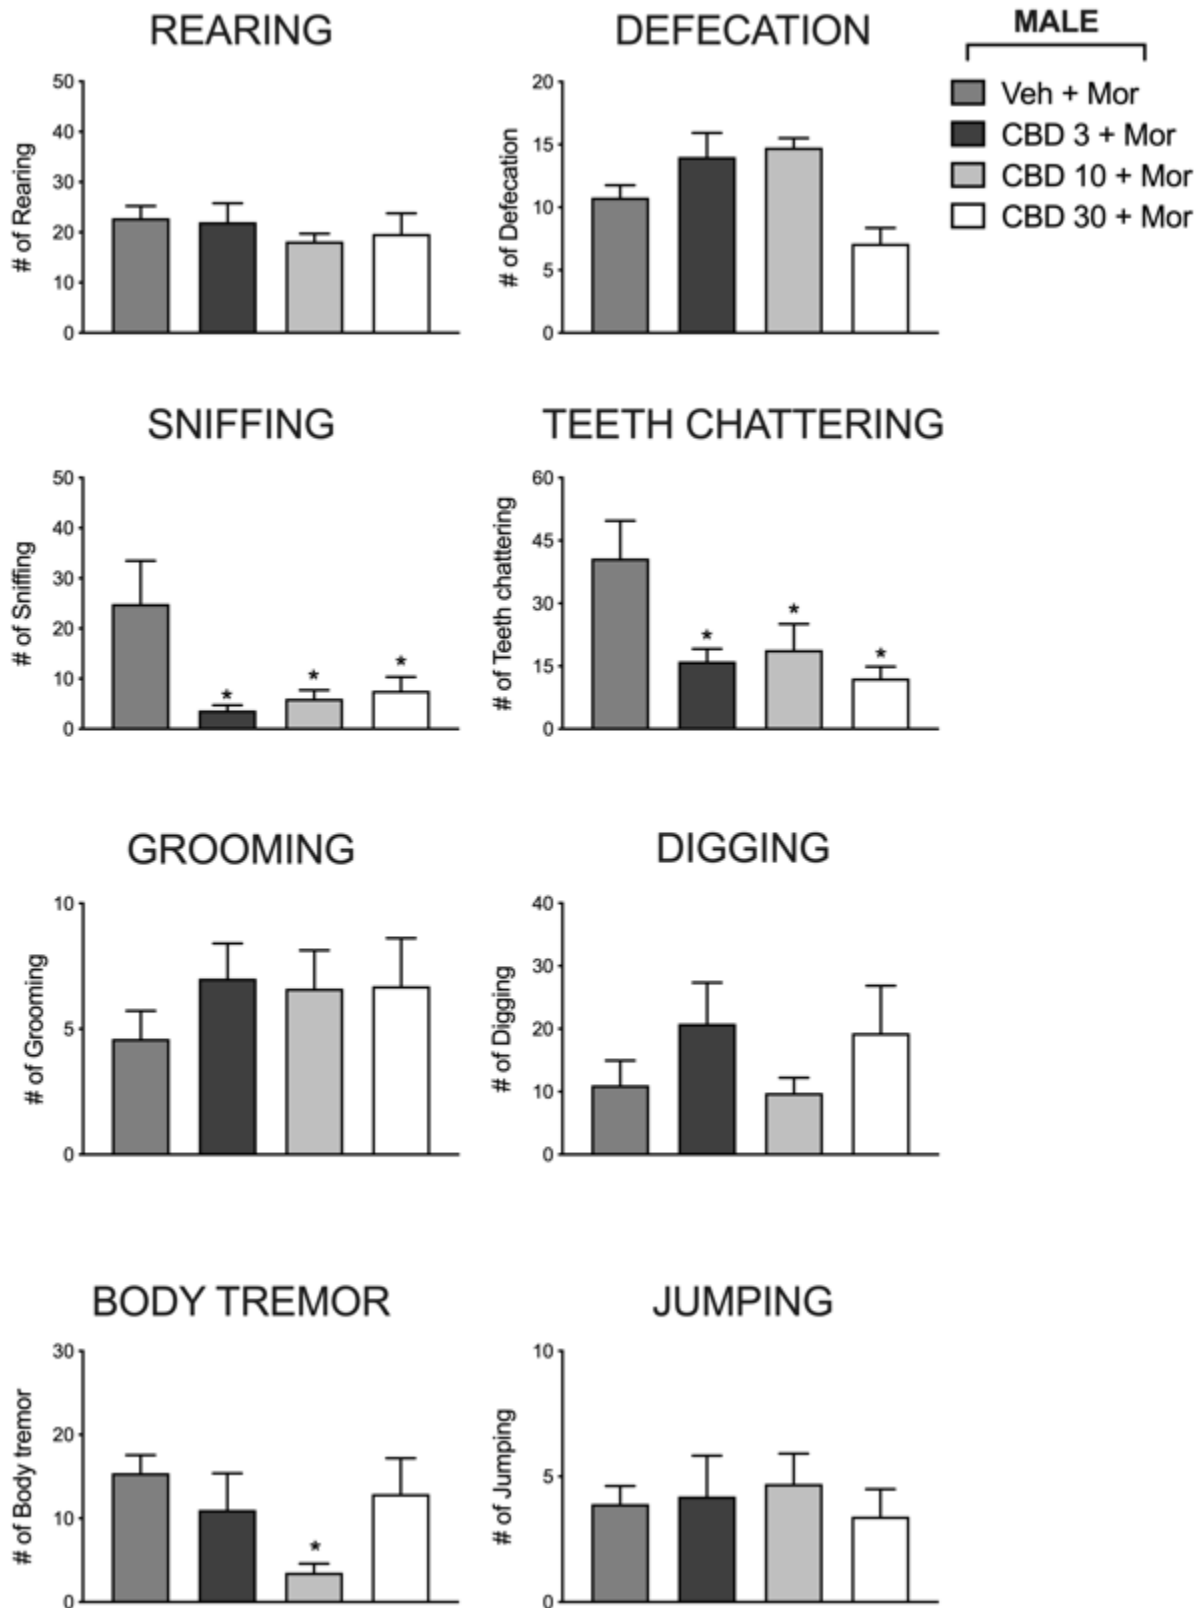

978 **Figure 5.**

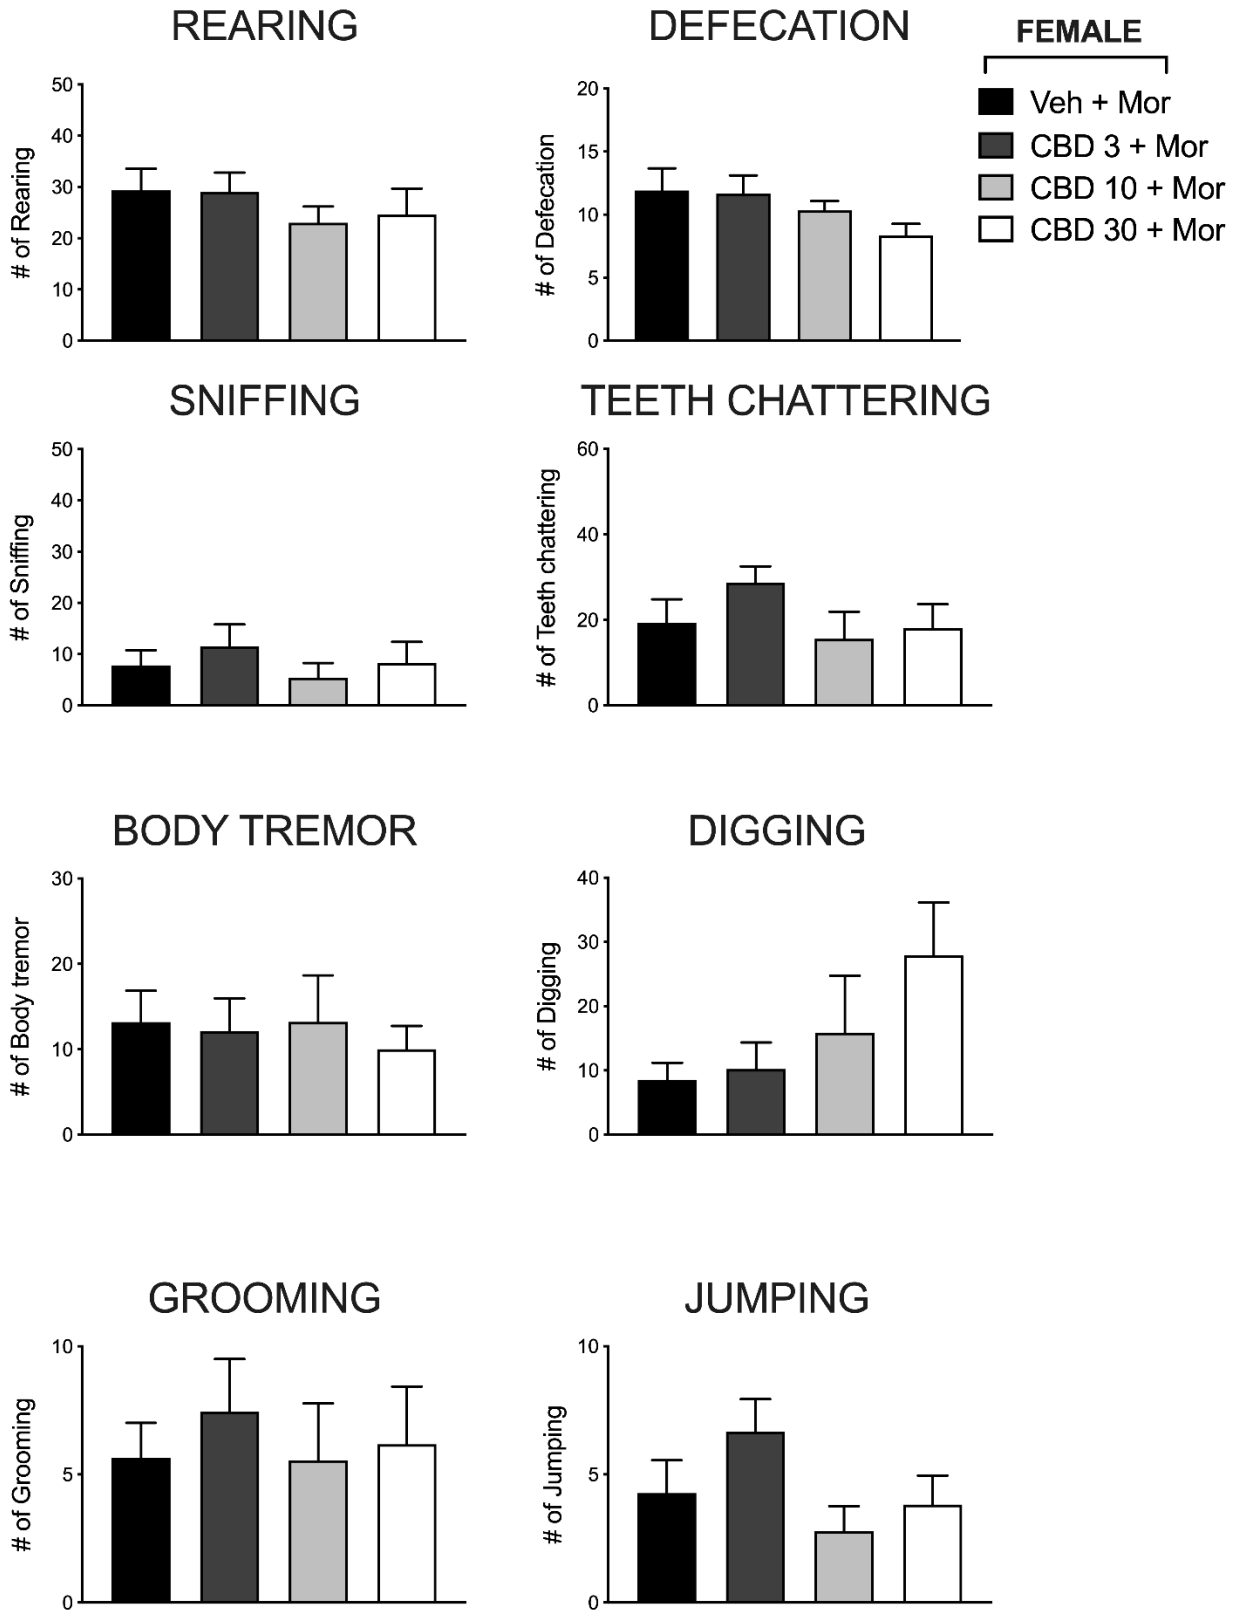

Source: https://www.biorxiv.org/content/10.1101/2024.01.22.576721v1.full.pdf
